# Supplementary material
Source: publisher figshare collection journal article supplement (https://acs.figshare.com/ndownloader/files/4610623)
Supplement: Supplementary file 1 [file 4610623]

**Supporting Information**

S **Table-1a** Structure with actual and predicted activity of alkyl-butyramides class of compounds.

| Molecule | Stereo | R1 | R2 | IC50  (nM) | pIC50  (M) | Predicted pIC50(M) | Residual |
| --- | --- | --- | --- | --- | --- | --- | --- |
| **1*** | **-** | H | H | 570 | 6.24 | 6.28 | -0.04 |
| **2** | **R** | Methyl | H | 231 | 6.64 | 6.45 | 0.19 |
| **3** | **S** | Methyl | H | 605 | 6.22 | 6.49 | -0.27 |
| **4** | **R** | Allyl | H | 193 | 6.71 | 6.71 | 0.00 |
| **5*** | **S** | *i*Propyl | H | 204 | 6.69 | 6.68 | 0.01 |
| **6** | **R** | *i*Propyl | H | 349 | 6.46 | 6.44 | 0.02 |
| **7** | **S** | *c*Propyl | H | 98 | 7.01 | 7.00 | 0.01 |
| **8** | **-** | H | Methyl | 173 | 6.67 | 6.93 | -0.26 |
| **9** | **S** | *c*Propyl | Methyl | 14 | 7.85 | 7.61 | 0.24 |
| **10** | **R** | *c*Propyl | Methyl | 80 | 7.10 | 7.27 | -0.17 |
| **11** | **S** | *c*Butyl | Methyl | 28 | 7.55 | 7.70 | -0.15 |
| **12** | **S** | *c*Propylmethyl | Methyl | 25 | 7.60 | 7.43 | 0.17 |

*** Test set molecules**

S **Table-1b** Structure with actual and predicted activity of alkyl-butyramides class of compounds.

| Molecule | Stereo | R1 | R2 | IC50  (nM) | pIC50 (M) | Predicted pIC50(M) | Residual |
| --- | --- | --- | --- | --- | --- | --- | --- |
| **13** | **S** | *c*Propyl | F | 280 | 6.55 | 6.72 | -0.17 |
| **14** | **S** | *c*Propyl | H | 285 | 6.54 | 6.66 | -0.12 |
| **15** | **R** | *n*Propyl | H | 126 | 6.90 | 6.43 | 0.47 |
| **16** | **R** | Allyl | H | 642 | 6.19 | 6.42 | -0.23 |

S **Table-1c** Structure with actual and predicted activity of arylglycinamide class of compounds.

| Molecule | Stereo | R | IC50  (nM) | pIC50  (M) | Predicted pIC50(M) | Residual |
| --- | --- | --- | --- | --- | --- | --- |
| **17*** | **S** | 4-F-Ph | 770 | 6.11 | 6.02 | 0.09 |
| **18*** | **S** | Ph | 1000 | 6.00 | 5.90 | 0.10 |
| **19** | **S** | 2-Thiophene | 865 | 6.06 | 6.09 | -0.03 |
| **20** | **S** | 3-Thiophene | 424 | 6.37 | 6.67 | -0.3 |

*** Test set molecules**

S **Table-1d** Structure with actual and predicted activity of arylglycinamide class of compounds.

| Molecule | Stereo | R | IC50  (nM) | pIC50  (M) | Predicted pIC50(M) | Residual |
| --- | --- | --- | --- | --- | --- | --- |
| **21** | **S** | 1-homopiperidinyl | 400 | 6.40 | 6.40 | 0.00 |
| **22** | **S** | 2-Me-1-piperidynyl | 838 | 6.08 | 6.40 | -0.32 |
| **23** | **S** | 4-Me-1-piperidynyl | 756 | 6.12 | 6.24 | -0.12 |
| **24*** | **S** | 4-Ph-1-piperidynyl | 822 | 6.08 | 6.58 | -0.50 |

*** Test set molecules**

S **Table-1e** Structure with actual and predicted activity of arylglycinamide class of compounds.

| Molecule | Stereo | R | IC50  (nM) | pIC50  (M) | Predicted pIC50(M) | Residual |
| --- | --- | --- | --- | --- | --- | --- |
| **25** | **S** | 3-Thiophene | 39 | 7.41 | 7.14 | 0.27 |
| **26** | **S** | Ph | 219 | 6.66 | 6.37 | 0.29 |
| **27** | **S** | 4-F-Ph | 175 | 6.76 | 6.49 | 0.27 |

S **Table-1f** Structure with actual and predicted activity of α–aminothiazole- γ -aminobutanoic amide class of compounds.

| Molecule | Stereo | R | IC50  (nM) | pIC50  (M) | Predicted pIC50(M) | Residual |
| --- | --- | --- | --- | --- | --- | --- |
| **28*** | **S** | Boc | 14.3 | 7.84 | 7.78 | 0.06 |
| **29** | **R** | Boc | 13.3 | 7.88 | 7.78 | 0.10 |
| **30** | **S** | H | 13.3 | 7.88 | 8.15 | -0.27 |
| **31** | **R** | H | 229 | 6.64 | 6.52 | 0.12 |
| **32** | **S** | CoMe | 1.8 | 8.74 | 8.89 | -0.15 |
| **33** | **R** | CoMe | 42 | 7.38 | 7.26 | 0.12 |
| **34*** | **S** | COOMe | 3.5 | 8.46 | 8.95 | -0.49 |
| **35** | **S** | CONHMe | 0.43 | 9.37 | 9.20 | 0.17 |
| **36** | **R** | CONHMe | 30 | 7.52 | 7.57 | -0.05 |

*** Test set molecules**


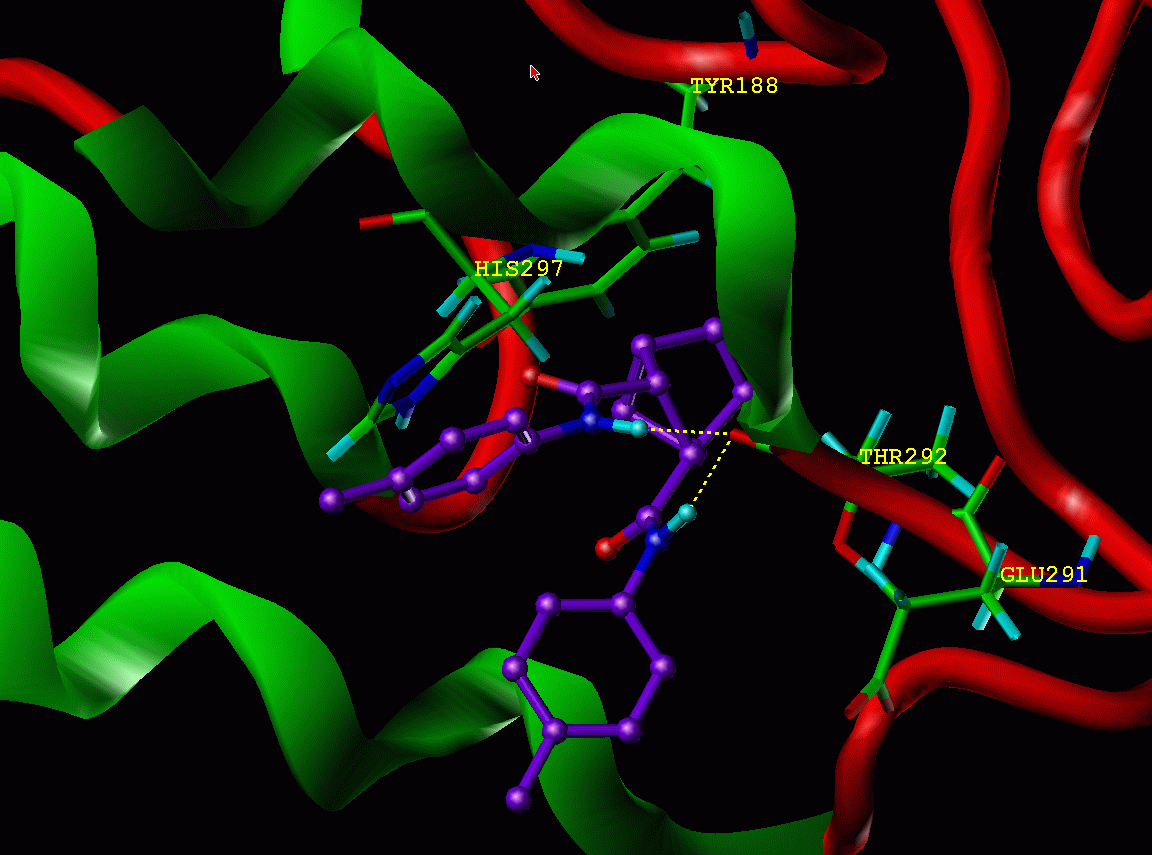


**S-Figure 1a** Docked structure of NSC **241420** in CCR2 (1KP1). The residues hydrogen bonded to the NSC **241420** are shown


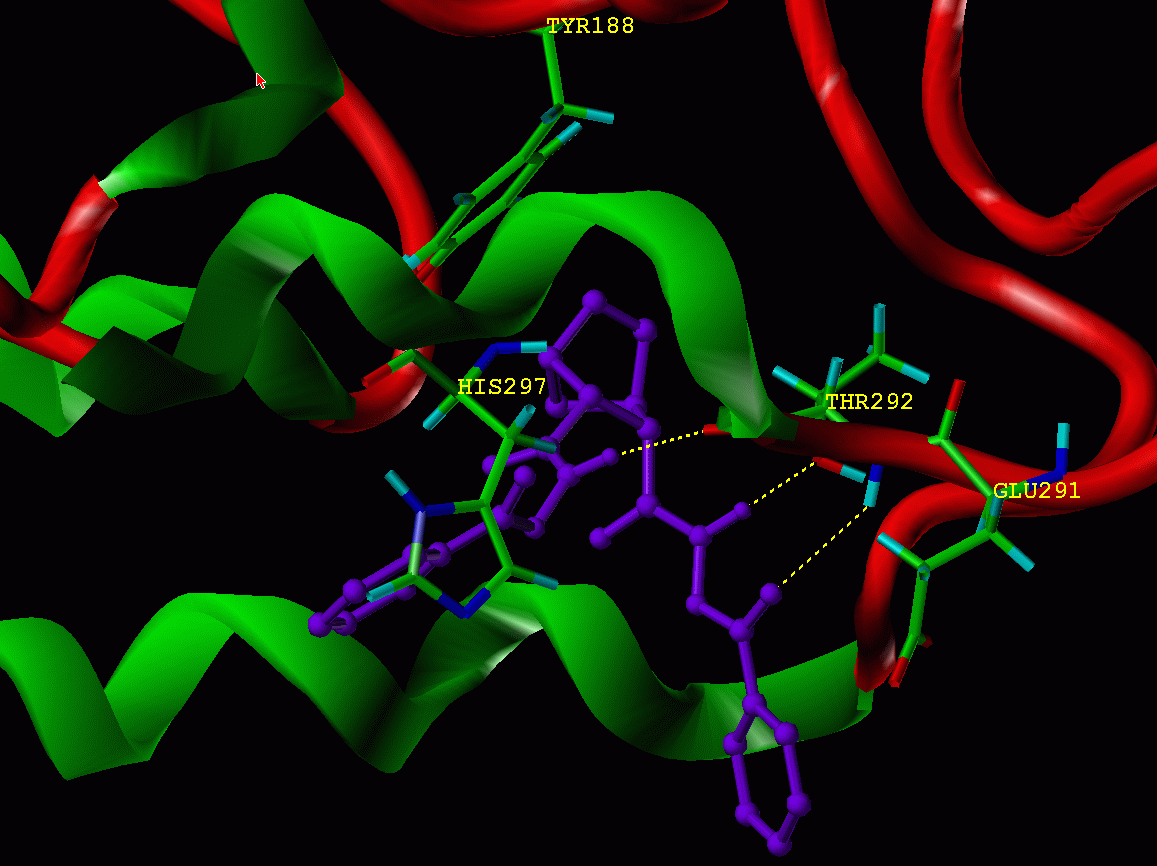


**S-Figure 1b** Docked structure of NSC **46716** in CCR2 (1KP1). The residues hydrogen bonded to the NSC **46716** are shown
